# Supplementary material for: Anticancer Effects of Targeting Hsp70 in Tumor Stromal Cells
Source: Oxford University Press journal article supplement (doi:10.1158/0008-5472.can-16-0800), 2016-08-08
Supplement: 00085472can160800-sup-163818_1_supp_3531731_g8gsg0.docx [file 00085472can160800-sup-163818_1_supp_3531731_g8gsg0.docx]

**Legends to Supplemental Figures.**

**Fig. S1.** JG-98 does not affect density of endothelial cells (CD31 staining) and fibroblasts (SMA, smooth muscle actin staining) in the tumor. The experiment is described in legends to Fig. 2. See Materials and Methods for further details.

**Fig. S2.** JG-98suppresses expression of p38. Macrophages were incubated with 0.3 uM JG-98 for 24 h, and the level of p38 was determined by immunoblotting.

**Fig. S3.** Cross section of tumor cell injection sites from WT and Hsp70KO mice. While density of macrophages inside tumor injection site was decreased in Hsp70KO (see Fig. 3A), there was a rim of macrophages (brown color) around injection site. See Materials and Methods for further details.
